# Supplementary material for: The utility of MEWS for predicting the mortality in the elderly adults with COVID-19: a retrospective cohort study with comparison to other predictive clinical scores
Source: PeerJ journal article supplement (doi:10.7717/peerj.10018), 2020-09-28
Supplement: Supplementary_Article_S1.pdf [file Supplementary_Article_S1.pdf]

# **Diagnosis and clinical classification of COVID-19-According to the Chinese Clinical Guidance for COVID-19 Pneumonia Diagnosis and Treatment 5th edition**

## I. Case Definitions

Outside the epicenter of Hubei province:

### 1. Suspect cases

Considering both the following epidemiological history and clinical manifestations:

#### 1.1 Epidemiological history

1.1.1 History of travel to or residence in Wuhan and its surrounding areas, or in other communities where cases have been reported within 14 days prior to the onset of the disease;

1.1.2 In contact with novel coronavirus infected people (with positive results for the nucleic acid test) within 14 days prior to the onset of the disease;

1.1.3 In contact with patients who have fever or respiratory symptoms from Wuhan and its surrounding area, or from communities where confirmed cases have been reported within 14 days before the onset of the disease;

#### 1.1.4 Clustered cases

#### 1.2 Clinical manifestations

1.2.1 Fever and/or respiratory symptoms;

1.2.2 The aforementioned imaging characteristics of NCP;

1.2.3 Normal or decreased WBC count, normal or decreased lymphocyte count in the early stage of onset.

A suspect case has any of the epidemiological history plus any two clinical manifestations or all

three clinical manifestations if there is no clear epidemiological history.

## 2. Confirmed cases

Suspect cases with one of the following etiological or serological evidences:

2.1 Real-time fluorescent RT-PCR indicates positive for new coronavirus nucleic acid;

2.2 Viral gene sequence is highly homologous to known new coronaviruses.

Hubei province

### 1. Suspect cases

Considering both the following epidemiological history and clinical manifestations:

#### 1.1 Epidemiological history

1.1.1 History of travel to or residence in Wuhan and its surrounding areas, or in other communities where cases have been reported within 14 days prior to the onset of the disease;

1.1.2 In contact with novel coronavirus infected people (with positive results for the nucleic acid test) within 14 days prior to the onset of the disease;

1.1.3 In contact with patients who have fever or respiratory symptoms from Wuhan and its surrounding area, or from communities where confirmed cases have been reported within 14 days before the onset of the disease;

#### 1.1.4 Clustered cases

#### 1.2 Clinical manifestations

1.2.1 Fever and/or respiratory symptoms;

1.2.2 Normal or decreased WBC count, normal or decreased lymphocyte count in the early stage of onset.

With or without any of the epidemiological history plus both of the clinical manifestations.

## 2. Clinically confirmed cases

Suspect cases with the aforementioned imaging characteristics of NCP;

## 3. Confirmed cases

Suspect cases or clinically confirmed cases with one of the following etiological or serological evidences:

3.1 Real-time fluorescent RT-PCR indicates positive for new coronavirus nucleic acid;

3.2 Viral gene sequence is highly homologous to known new coronaviruses.

## II . Clinical Classification

### 1. Mild cases

The clinical symptoms were mild, and there was no sign of pneumonia on imaging.

### 2. Moderate cases

Showing fever and respiratory symptoms with radiological findings of pneumonia.

### 3. Severe cases

Adult cases meeting any of the following criteria:

(1) Respiratory distress ( $\geq 30$  breaths/ min);

(2) Oxygen saturation  $\leq 93\%$  at rest;

(3) Arterial partial pressure of oxygen (PaO<sub>2</sub>)/ fraction of inspired oxygen (FiO<sub>2</sub>)  $\leq 300$  mmHg (1 mmHg=0.133kPa).

### 4. Critical cases

Cases meeting any of the following criteria:

4.1 Respiratory failure and requiring mechanical ventilation;

4.2 Shock;

4.3 With other organ failure that requires ICU care.

**Supplementary Text S2 APACHE II score, CURB-65 score, PSI score, SOFA score, MEWS score, qSOFA score, and SIRS Criteria**

**Text S2.1 Acute Physiology and Chronic Health Evaluation II (APACHE II)**

- Use the worst value for each physiological variable during the first 24 hours after admission to ICU.

| Physiological variable                                                                                                     | +4   | +3          | +2          | +1            | +0                      | +1                     | +2          | +3                       | +4                   |
|----------------------------------------------------------------------------------------------------------------------------|------|-------------|-------------|---------------|-------------------------|------------------------|-------------|--------------------------|----------------------|
| Temperature<br>– rectal °C                                                                                                 | ≥41  | 39–<br>40.9 |             | 38.5–<br>38.9 | 36–<br>38.4             | 34–<br>35.9            | 32–<br>33.9 | 30–<br>31.9              | ≤29.9                |
| Mean arterial pressure –<br>mmHg                                                                                           | ≥160 | 130–<br>159 | 110–<br>129 |               | 70–<br>109              |                        | 50–69       |                          | ≤49                  |
| Heart rate<br>(ventricular response)                                                                                       | ≥180 | 140–<br>179 | 110–<br>139 |               | 70–<br>109              |                        | 55–69       | 40–54                    | ≤39                  |
| Respiratory rate (non-ventilated or ventilated)                                                                            | ≥50  | 35–49       |             | 25–34         | 12–24                   | 10–<br>11              | 6–9         |                          | ≤5                   |
| Oxygenation<br>A. aDO <sub>2</sub> or<br>PaO <sub>2</sub> (mmHg)<br>FiO <sub>2</sub> ≥0.5<br>record A.<br>aDO <sub>2</sub> | ≥500 | 350–<br>499 | 200–<br>349 |               | < 200                   |                        |             |                          |                      |
| FiO <sub>2</sub> < 0.5<br>record only                                                                                      |      |             |             |               | PO <sub>2</sub><br>> 70 | PO <sub>2</sub><br>61– |             | PO <sub>2</sub><br>55–60 | PO <sub>2</sub> < 55 |

|                                                                             |                                                    |              |             |              |               |           |               |               |        |
|-----------------------------------------------------------------------------|----------------------------------------------------|--------------|-------------|--------------|---------------|-----------|---------------|---------------|--------|
| PaO <sub>2</sub>                                                            |                                                    |              |             |              |               | 70        |               |               |        |
| Arterial pH                                                                 | ≥7.7                                               | 7.6–<br>7.69 |             | 7.5–<br>7.59 | 7.33–<br>7.49 |           | 7.25–<br>7.32 | 7.15–<br>7.24 | < 7.15 |
| Serum sodium (mmol/L)                                                       | ≥180                                               | 160–<br>179  | 155–<br>159 | 150–<br>154  | 130–<br>149   |           | 120–<br>129   | 111–<br>119   | ≤110   |
| Serum potassium (mmol/L)                                                    | ≥7                                                 | 6–6.9        |             | 5.5–<br>5.9  | 3.5–<br>5.4   | 3–<br>3.4 | 2.5–<br>2.9   |               | < 2.5  |
| Serum creatinine (mg/100mL)<br>(Double point score for acute renal failure) | ≥3.5                                               | 2–3.4        | 1.5–<br>1.9 |              | 0.6–<br>1.4   |           | < 0.6         |               |        |
| Hematocrit %                                                                | ≥60                                                |              | 50–<br>59.9 | 46–<br>49.9  | 30–<br>45.9   |           | 20–<br>29.9   |               | < 20   |
| White blood count (total/mm <sup>3</sup> )                                  | ≥40                                                |              | 20–<br>39.9 | 15–<br>19.9  | 3–<br>14.9    |           | 1–2.9         |               | < 1    |
| Glasgow coma score (GCS)                                                    | Glasgow coma score (GCS) Score=15 minus actual GCS |              |             |              |               |           |               |               |        |
| Serum HCO <sub>2</sub> (venous mmol/L) (Not                                 | ≥52                                                | 41–<br>51.9  |             | 32–<br>40.9  | 23–<br>31.9   |           | 18–<br>21.9   | 15–<br>17.9   | < 15   |

|                                  |  |  |  |  |  |  |  |  |  |
|----------------------------------|--|--|--|--|--|--|--|--|--|
| preferred,<br>use if no<br>ABGs) |  |  |  |  |  |  |  |  |  |
|----------------------------------|--|--|--|--|--|--|--|--|--|

**Acute Physiology and Chronic Health Evaluation II : Previous Health Status**

| B Age Points                    |        | C Chronic Health Points                                                                                                                                                                                                                                                                                                                                                                                                                                                                                                                                                                                          |                                                                                                                                                                                                                                                                                                                                                                                                                                                                                                                                                                                                                 | Score                   |
|---------------------------------|--------|------------------------------------------------------------------------------------------------------------------------------------------------------------------------------------------------------------------------------------------------------------------------------------------------------------------------------------------------------------------------------------------------------------------------------------------------------------------------------------------------------------------------------------------------------------------------------------------------------------------|-----------------------------------------------------------------------------------------------------------------------------------------------------------------------------------------------------------------------------------------------------------------------------------------------------------------------------------------------------------------------------------------------------------------------------------------------------------------------------------------------------------------------------------------------------------------------------------------------------------------|-------------------------|
| Assign points to age as follows |        | <p>If the patient has a history of severe organ system insufficiency or is immune-compromised assign points as follows</p> <p>a: for nonoperative or emergency postoperative patients – 5 points <b>or</b></p> <p>b: for elective postoperative patients – 2 points</p> <p><b>Definitions</b></p> <p>Organ insufficiency or immunocompromised state must have been evident prior to this hospital admission and conform to the following criteria:</p> <p>Liver – biopsy proven cirrhosis and documented portal hypertension; episodes of past upper GI bleeding attributed to portal hypertension; or prior</p> | <p>Respiratory–Chronic restrictive, obstructive, or vascular disease resulting in severe exercise restriction (i.e., unable to climb stairs or perform household duties); or documented chronic hypoxia, hypercapnia, secondary polycythemia, severe pulmonary hypertension ( &gt; 40 mmHg), or respirator dependency.</p> <p>Renal – receiving chronic dialysis. Immunocompromised – the patient has received therapy that suppresses resistance to infection (e.g., immunosuppression, chemotherapy, radiation, long term or recent high dose steroids, or has a disease that is sufficiently advanced to</p> | Sum of A+B+C            |
| Age (yrs)                       | Points |                                                                                                                                                                                                                                                                                                                                                                                                                                                                                                                                                                                                                  |                                                                                                                                                                                                                                                                                                                                                                                                                                                                                                                                                                                                                 | A APS points            |
| ≤44                             | 0      |                                                                                                                                                                                                                                                                                                                                                                                                                                                                                                                                                                                                                  |                                                                                                                                                                                                                                                                                                                                                                                                                                                                                                                                                                                                                 | B Age points            |
| 45–54                           | 2      |                                                                                                                                                                                                                                                                                                                                                                                                                                                                                                                                                                                                                  |                                                                                                                                                                                                                                                                                                                                                                                                                                                                                                                                                                                                                 | C Chronic Health points |
| 55–64                           | 3      |                                                                                                                                                                                                                                                                                                                                                                                                                                                                                                                                                                                                                  |                                                                                                                                                                                                                                                                                                                                                                                                                                                                                                                                                                                                                 |                         |
| 65–74                           | 5      |                                                                                                                                                                                                                                                                                                                                                                                                                                                                                                                                                                                                                  |                                                                                                                                                                                                                                                                                                                                                                                                                                                                                                                                                                                                                 | Total APACHE II         |
| ≥75                             | 6      |                                                                                                                                                                                                                                                                                                                                                                                                                                                                                                                                                                                                                  |                                                                                                                                                                                                                                                                                                                                                                                                                                                                                                                                                                                                                 |                         |

|  |  |                                                                                                          |                                                                    |  |
|--|--|----------------------------------------------------------------------------------------------------------|--------------------------------------------------------------------|--|
|  |  | episodes of hepatic failure/encephalopathy/coma<br>Cardiovascular – New York Heart Association Class IV. | suppress resistance to infection, e.g., leukemia, lymphoma, AIDS). |  |
|--|--|----------------------------------------------------------------------------------------------------------|--------------------------------------------------------------------|--|

Glasgow coma score (GCS)

| Factors              | points             |                         |                     |                    |                |                |
|----------------------|--------------------|-------------------------|---------------------|--------------------|----------------|----------------|
|                      | 1                  | 2                       | 3                   | 4                  | 5              | 6              |
| Eye Opening Response | No eye opening     | To pain                 | To verbal command   | Spontaneously      | ---            | ---            |
| Verbal Response      | No verbal response | Incomprehensible sounds | Inappropriate words | Confused           | Oriented       |                |
| Motor Response       | No motor response  | Extension to pain       | Flexion to pain     | Withdraw from pain | Localizes pain | Obeys commands |



**Text S2.2 CURB-65 score**

|                                                                                                                      |                     |                                                                               |
|----------------------------------------------------------------------------------------------------------------------|---------------------|-------------------------------------------------------------------------------|
| Factors                                                                                                              | Points              |                                                                               |
| Confusion                                                                                                            | 1                   |                                                                               |
| BUN > 19 mg/dL (> 7 mmol/L)                                                                                          | 1                   |                                                                               |
| Respiratory Rate ≥ 30                                                                                                | 1                   |                                                                               |
| Systolic BP < 90 mmHg or Diastolic BP ≤ 60 mmHg                                                                      | 1                   |                                                                               |
| Age ≥ 65                                                                                                             | 1                   |                                                                               |
| Total score                                                                                                          |                     |                                                                               |
| CURB-65 Score                                                                                                        | mortality Risk, (%) | Recommendation                                                                |
| 0                                                                                                                    | 0.9%                | Low risk, Outpatient care                                                     |
| 1                                                                                                                    | 5.2%                | Low risk, Inpatient vs. observation admission                                 |
| 2                                                                                                                    | 12%                 |                                                                               |
| 3 or 4                                                                                                               | 31.2%               | Inpatient admission with consideration for ICU admission with score of 4 or 5 |
| The CURB-65 Score includes points for confusion and blood urea nitrogen, respiratory rates, blood pressure, and age. |                     |                                                                               |

**Text S2.3 Pneumonia Severity Index (PSI)**

| <b>Factor</b>                                                      | <b>PSI score</b>                        |
|--------------------------------------------------------------------|-----------------------------------------|
| Patient age                                                        | Age in years (male) or age -10 (female) |
| Nursing home resident                                              | +10                                     |
| <b>Coexisting illnesses</b>                                        |                                         |
| Neoplastic disease                                                 | +30                                     |
| Liver disease                                                      | +20                                     |
| Congestive cardiac failure                                         | +10                                     |
| Cerebrovascular disease                                            | +10                                     |
| Renal disease                                                      | +10                                     |
| <b>Signs on examination</b>                                        |                                         |
| Altered mental state                                               | +20                                     |
| Respiratory rate $\geq 30$ per minute                              | +20                                     |
| Systolic blood pressure $< 90$ mmHg                                | +20                                     |
| Temperature $\leq 35^{\circ}\text{C}$ or $\geq 40^{\circ}\text{C}$ | +15                                     |
| Pulse rate $\geq 125$ bpm                                          | +10                                     |
| <b>Results of investigations</b>                                   |                                         |
| Arterial pH $< 7.35$                                               | +30                                     |
| Serum urea level $\geq 11$ mmol/l                                  | +20                                     |
| Serum sodium level $< 130$ mmol/l                                  | +10                                     |
| Serum glucose level $\geq 14$ mmol/L                               | +10                                     |
| Hematocrit $< 30\%$                                                | +10                                     |
| $PO_2 < 60$ mmHg or $O_2$ saturation $< 90\%$                      | +10                                     |
| Pleural effusion                                                   | +10                                     |



**Text S2.4 SOFA Score**

| <b>Variables</b>                             | <b>0</b>          | <b>1</b>            | <b>2</b>                                                | <b>3</b>                                                                            | <b>4</b>                                                                            |
|----------------------------------------------|-------------------|---------------------|---------------------------------------------------------|-------------------------------------------------------------------------------------|-------------------------------------------------------------------------------------|
| Respiration                                  |                   |                     |                                                         |                                                                                     |                                                                                     |
| PaO <sub>2</sub> /FiO <sub>2</sub><br>(mmHg) | > 400             | ≤400                | ≤300                                                    | ≤200 (with<br>respiratory<br>support)                                               | ≤100                                                                                |
| Coagulation                                  |                   |                     |                                                         |                                                                                     |                                                                                     |
| Platelets × 10 <sup>3</sup> /ml              | > 150             | ≤150                | ≤100                                                    | ≤50                                                                                 | ≤20                                                                                 |
| Liver                                        |                   |                     |                                                         |                                                                                     |                                                                                     |
| Bilirubin mg/dl<br>mol/liter                 | < 1.2             | 1.2–<br>1.9         | 2.0–5.9                                                 | 6.0–11.9                                                                            | > 12.0                                                                              |
|                                              | < 20              | 20–32               | 33–101                                                  | 102–204                                                                             | > 204                                                                               |
| Cardiovascular                               |                   |                     |                                                         |                                                                                     |                                                                                     |
| Hypotension                                  | No<br>hypotension | MAP<br>< 70<br>mmHg | Dopamine<br>≤5<br>dobutamine<br>(any dose) <sup>a</sup> | Dopamine > 5<br>or<br>epinephrine ≤0.1<br>or<br>norepinephrine<br>≤0.1 <sup>a</sup> | Dopamine > 15<br>or epinephrine<br>> 0.1 or<br>norepinephrine<br>> 0.1 <sup>a</sup> |
| Central nervous<br>system                    |                   |                     |                                                         |                                                                                     |                                                                                     |
| Glasgow Coma<br>Score                        | 15                | 13–14               | 10–12                                                   | 6–9                                                                                 | < 6                                                                                 |
| Renal                                        |                   |                     |                                                         |                                                                                     |                                                                                     |
| Cr<br>mg/dl                                  | < 1.2             | 1.2–<br>1.9         | 2.0–3.4                                                 | 3.5–4.9                                                                             | ≥5.0                                                                                |

|              |       |             |         |              |              |
|--------------|-------|-------------|---------|--------------|--------------|
| mol/liter    | < 110 | 110–<br>170 | 171–299 | 300–440      | > 440        |
| Urine output | –     | –           | –       | < 500 ml/day | < 200 ml/day |

a: Adrenergic agents administered for at least 1 hr (doses given are in  $\mu\text{g}/\text{kg}/\text{min}$ ).

**Text S2.5 Modified Early Warning Score (MEWS score)**

| Score                                    | 3       | 2         | 1           | 0           | 1                    | 2                   | 3            |
|------------------------------------------|---------|-----------|-------------|-------------|----------------------|---------------------|--------------|
| Respiratory rate<br>(min <sup>-1</sup> ) |         | ≤ 8       |             | 9–14        | 15–20                | 21–29               | > 29         |
| Heart rate (min <sup>-1</sup> )          |         | ≤ 40      | 41–50       | 51–<br>100  | 101–110              | 111–129             | > 129        |
| Systolic BP<br>(mmHg)                    | ≤<br>70 | 71–<br>80 | 81–<br>100  | 101–<br>199 |                      | ≥ 200               |              |
| Urine output<br>(ml/kg/h)                | Nil     | <<br>0.5  |             |             |                      |                     |              |
| Temperature (°C)                         |         | ≤ 35      | 35.1–<br>36 | 36.1–<br>38 | 38.1–38.5            | ≥ 38.6              |              |
| Neurological                             |         |           |             | Alert       | Reacting to<br>voice | Reacting to<br>pain | Unresponsive |

The scores for each parameter are recorded at the time that observations are taken. If the total is 4 or more then the ward doctor is informed.

**Text S2.6 SIRS Criteria ( $\geq 2$  meets SIRS definition)**

|                        |                                                                              |
|------------------------|------------------------------------------------------------------------------|
| Temperature            | $\leq 36^{\circ} \text{ C}$ or $\geq 38^{\circ} \text{ C}$                   |
| Heart Rate             | $\geq 90$ bpm                                                                |
| Respiratory Rate       | $\geq 20$ breaths/min <b>or</b> $\text{PaCO}_2 < 32$ mmHg                    |
| White Blood Cell Count | $\geq 12,000$ or $\leq 4,000$ cells/mm <sup>3</sup> <b>or</b> $> 10\%$ bands |

**Text S2.7 qSOFA (Quick SOFA) Score**

|                              |    |     |
|------------------------------|----|-----|
| Altered mental status GCS<15 | No | Yes |
| Respiratory rate $\geq 22$   | No | Yes |
| Systolic BP $\leq 100$       | No | Yes |

A “positive” qSOFA Score ( $\geq 2$ ) suggests high risk of poor outcome in patients with suspected infection.
